# Supplementary material for: Searching for SNPs with cloud computing
Source: Springer Nature journal article supplement (doi:10.1186/gb-2009-10-11-r134), 2009-11-20

## Input Filesystem

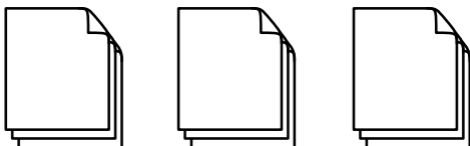

Preprocessed reads

## Cluster

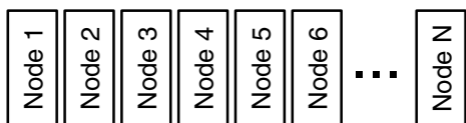

Map

Align reads with Bowtie

Alignments

Sort

Bin alignments into reference partitions and sort along forward reference strand

Reduce

Call SNPs in a partition with SOAPsnp

SNP calls

## Output Filesystem

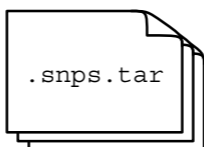

Supplement: 13059_2009_2284_MOESM3_ESM.pdf [file 13059_2009_2284_MOESM3_ESM.pdf]
