# Supplementary material for: Searching for SNPs with cloud computing
Source: Springer Nature journal article supplement (doi:10.1186/gb-2009-10-11-r134), 2009-11-20

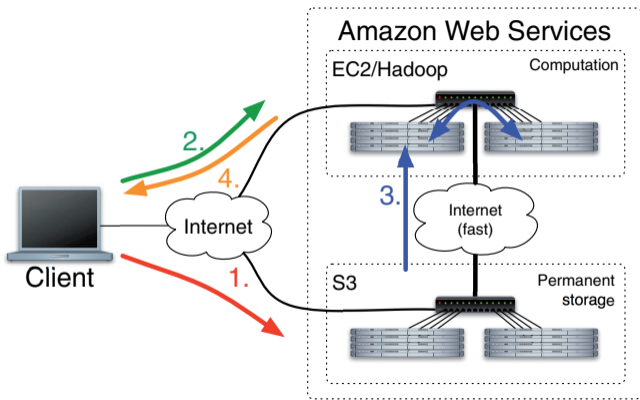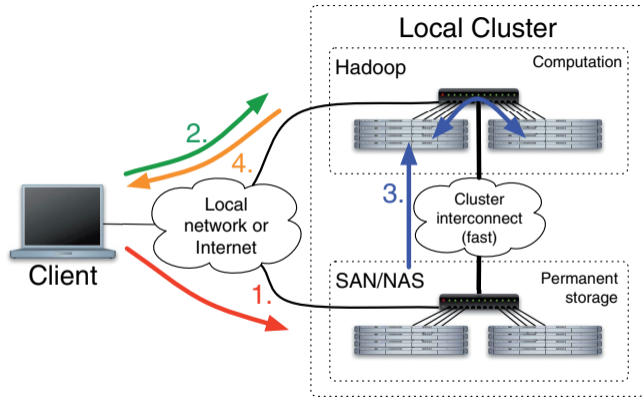

Supplement: 13059_2009_2284_MOESM4_ESM.pdf [file 13059_2009_2284_MOESM4_ESM.pdf]
